# Supplementary material for: Complex genetic dependencies among growth and neurological phenotypes in healthy children: Towards deciphering developmental mechanisms
Source: PubMed Central journal article supplement (PMC7714163; doi:10.1371/journal.pone.0242684), 2020-12-03

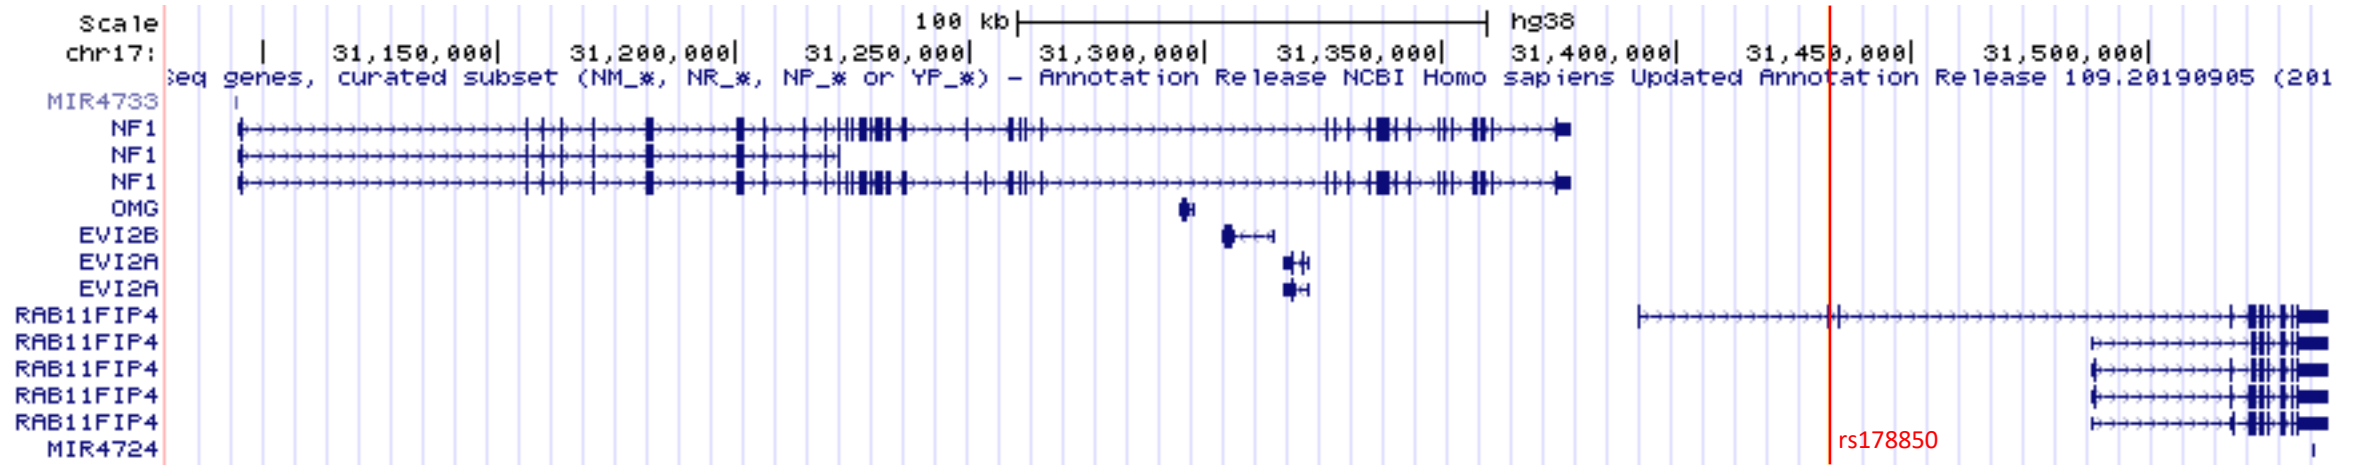

Supplement: pone.0242684.s009.pdf [file pone.0242684.s009.pdf]
